# Supplementary material
Source: HighWire-hosted journal article supplement (http://jneurosci.org/highwire/filestream/598950/field_highwire_adjunct_files/4/Suppl_table_2.pdf)
Supplement: Suppl_table_2.pdf [file Suppl_table_2.pdf]

Supplementary table 2: Energy metabolism related genes

| Gene         | Gene title                                              | Fold change     | Regulation in | Corr.         | Probe Set ID |
|--------------|---------------------------------------------------------|-----------------|---------------|---------------|--------------|
| Symbol       |                                                         | GLT1+ vs. Thy1+ | GLT1+ cells   | P-value       |              |
| <i>Aco1</i>  | Aconitase 1                                             | 2.4             | up            | <b>0.0051</b> | 1423644_at   |
| <i>Aco2</i>  | Aconitase 2, mitochondrial                              | 2.0             | up            | <b>0.0119</b> | 1451002_at   |
| <i>Aldoa</i> | Aldolase 1, a isoform                                   | 1.5             | up            | <b>0.0428</b> | 1434799_x_at |
| <i>Aldoc</i> | Aldolase 3, c isoform                                   | 118.7           | up            | <b>0.0001</b> | 1424714_at   |
| <i>Bpgm</i>  | 2,3-bisphosphoglycerate mutase                          | 2.3             | up            | 0.2119        | 1415864_at   |
| <i>Cs</i>    | Citrate synthase                                        | 2.2             | up            | <b>0.0091</b> | 1422578_at   |
| <i>Dlst</i>  | Dihydrolipoamide s-succinyltransferase                  | 1.0             | up            | 0.9344        | 1423710_at   |
| <i>Eno1</i>  | Enolase 1, alpha non-neuron                             | 50.2            | up            | <b>0.0107</b> | 1419022_a_at |
| <i>Eno2</i>  | Enolase 2, gamma neuronal                               | 2.2             | down          | <b>0.0113</b> | 1418829_a_at |
| <i>Fh1</i>   | Fumarate hydratase 1                                    | 2.5             | up            | <b>0.0062</b> | 1424828_a_at |
| <i>G6pdx</i> | Glucose-6-phosphate dehydrogenase x-linked              | 1.7             | up            | 0.1096        | 1448354_at   |
| <i>Gad1</i>  | Glutamic acid decarboxylase 1                           | 17.2            | down          | <b>0.0016</b> | 1416561_at   |
| <i>Gls</i>   | Glutaminase                                             | 1.7             | down          | <b>0.0062</b> | 1434657_at   |
| <i>Glud1</i> | Glutamate dehydrogenase 1                               | 4.3             | up            | <b>0.0023</b> | 1448253_at   |
| <i>Glul</i>  | Glutamate-ammonia ligase (glutamine synthetase)         | 3.3             | up            | <b>0.0023</b> | 1426235_a_at |
| <i>Got1</i>  | Glutamate oxaloacetate transaminase 1, soluble          | 3.2             | up            | <b>0.0171</b> | 1450970_at   |
| <i>Got2</i>  | Glutamate oxaloacetate transaminase 2,<br>mitochondrial | 1.5             | down          | 0.2135        | 1430397_at   |
| <i>Gpd1</i>  | Glycerol-3-phosphate dehydrogenase 1 (soluble)          | 1.7             | down          | 0.0607        | 1416204_at   |
| <i>Gpd1l</i> | Glycerol-3-phosphate dehydrogenase 1-like               | 1.7             | up            | 0.0879        | 1438195_at   |
| <i>Gpd2</i>  | Glycerol phosphate dehydrogenase 2, mitochondrial       | 1.9             | up            | <b>0.0231</b> | 1452741_s_at |
| <i>Gpi1</i>  | Glucose phosphate isomerase 1                           | 2.3             | up            | <b>0.0128</b> | 1434814_x_at |
| <i>Gys1</i>  | Glycogen synthase 1, muscle                             | 4.4             | up            | <b>0.0187</b> | 1450196_s_at |
| <i>Hk1</i>   | Hexokinase 1                                            | 1.9             | up            | 0.0541        | 1437974_a_at |
| <i>Hk2</i>   | Hexokinase 2                                            | 3.6             | up            | 0.1463        | 1422612_at   |
| <i>Idh3a</i> | Isocitrate dehydrogenase 3 (nad+) alpha                 | 1.5             | up            | <b>0.0262</b> | 1432016_a_at |
| <i>Idh3b</i> | Isocitrate dehydrogenase 3 (nad+) beta                  | 3.0             | up            | <b>0.0026</b> | 1418886_s_at |
| <i>Idh3g</i> | Isocitrate dehydrogenase 3 (nad+), gamma                | 8.5             | up            | <b>0.0116</b> | 1416789_at   |
| <i>Ldhb</i>  | Lactate dehydrogenase b                                 | 13.6            | up            | <b>0.0001</b> | 1434499_a_at |
| <i>Mdh1</i>  | Malate dehydrogenase 1, nad (soluble)                   | 3.2             | up            | <b>0.0091</b> | 1454925_x_at |
| <i>Mdh2</i>  | Malate dehydrogenase 2, nad (mitochondrial)             | 2.0             | up            | 0.0650        | 1416478_a_at |

| Gene            | Gene title                                                               | Fold change     | Regulation in | Corr.         | Probe Set ID |
|-----------------|--------------------------------------------------------------------------|-----------------|---------------|---------------|--------------|
| Symbol          |                                                                          | GLT1+ vs. Thy1+ | GLT1+ cells   | P-value       |              |
| <i>Me2</i>      | Malic enzyme 2, nad(+)-dependent, mitochondrial                          | 1.6             | down          | 0.1410        | 1426573_at   |
| <i>Mod1</i>     | Malic enzyme, supernatant                                                | 5.6             | up            | <b>0.0046</b> | 1416632_at   |
| <i>Ogdh</i>     | Oxoglutarate dehydrogenase (lipoamide)                                   | 1.7             | up            | 0.0677        | 1451274_at   |
| <i>Pcx</i>      | Pyruvate carboxylase                                                     | 2.4             | up            | <b>0.0016</b> | 1416383_a_at |
| <i>Pfkl</i>     | Phosphofructokinase, liver, b-type                                       | 1.3             | up            | 0.1426        | 1450269_a_at |
| <i>Pfkm</i>     | Phosphofructokinase, muscle                                              | 4.2             | up            | <b>0.0007</b> | 1416780_at   |
| <i>Pfkp</i>     | Phosphofructokinase, platelet                                            | 2.9             | up            | <b>0.0091</b> | 1416069_at   |
| <i>Pgam1</i>    | Phosphoglycerate mutase 1                                                | 1.4             | up            | <b>0.0210</b> | 1426554_a_at |
| <i>Pgk1</i>     | Phosphoglycerate kinase 1                                                | 1.5             | up            | 0.1087        | 1417864_at   |
| <i>Pgm2</i>     | Phosphoglucomutase 2                                                     | 8.7             | up            | <b>0.0015</b> | 1451149_at   |
| <i>Pgm2l1</i>   | Phosphoglucomutase 2-like 1                                              | 3.2             | down          | <b>0.0062</b> | 1452841_at   |
| <i>Pgm5</i>     | Phosphoglucomutase 5                                                     | 44.9            | down          | <b>0.0023</b> | 1437871_at   |
| <i>Pkm2</i>     | Pyruvate kinase, muscle                                                  | 1.1             | up            | 0.4985        | 1417308_at   |
| <i>Pygb</i>     | Brain glycogen phosphorylase                                             | 3.5             | up            | <b>0.0095</b> | 1433504_at   |
| <i>Pygl</i>     | Liver glycogen phosphorylase                                             | 17.6            | up            | <b>0.0043</b> | 1417741_at   |
| <i>Pygm</i>     | Muscle glycogen phosphorylase                                            | 3.6             | up            | <b>0.0099</b> | 1448602_at   |
| <i>Sdha</i>     | Succinate dehydrogenase complex, subunit a,<br>flavoprotein (fp)         | 1.3             | up            | 0.1825        | 1426688_at   |
| <i>Sdhb</i>     | Succinate dehydrogenase complex, subunit b, iron<br>sulfur (ip)          | 1.2             | up            | 0.1967        | 1418005_at   |
| <i>Sdhc</i>     | Succinate dehydrogenase complex, subunit c,<br>integral membrane protein | 2.1             | up            | <b>0.0062</b> | 1448630_a_at |
| <i>Sdhd</i>     | Succinate dehydrogenase complex, subunit d,<br>integral membrane protein | 5.1             | up            | <b>0.0062</b> | 1437489_x_at |
| <i>Slc25a12</i> | Solute carrier family 25 (mitochondrial carrier,<br>aralar), member 12   | 2.5             | up            | 0.1096        | 1428440_at   |
| <i>Sucla2</i>   | Succinate-coenzyme a ligase, adp-forming, beta<br>subunit                | 1.4             | up            | 0.0705        | 1452206_at   |
| <i>Suclg1</i>   | Succinate-coa ligase, gdp-forming, alpha subunit                         | 4.6             | up            | <b>0.0001</b> | 1415891_at   |
| <i>Suclg2</i>   | Succinate-coenzyme a ligase, gdp-forming, beta<br>subunit                | 6.5             | up            | <b>0.0373</b> | 1427441_a_at |
| <i>Tpi1</i>     | Triosephosphate isomerase 1                                              | 4.8             | up            | <b>0.0048</b> | 1452927_x_at |

| <b>Gene</b>   | <b>Gene title</b>               | <b>Fold change</b>     | <b>Regulation in</b> | <b>Corr.</b>   | <b>Probe Set ID</b> |
|---------------|---------------------------------|------------------------|----------------------|----------------|---------------------|
| <b>Symbol</b> |                                 | <b>GLT1+ vs. Thy1+</b> | <b>GLT1+ cells</b>   | <b>P-value</b> |                     |
| <i>Ugp2</i>   | UDP-glucose pyrophosphorylase 2 | 2.3                    | up                   | <b>0.0107</b>  | 1426461_at          |

Comparison between GLT1+ astrocytes (n = 6) and Thy1-YFP+ neurons (n = 3). Fold change indicates the ratio between GLT1+ astrocytes and Thy1-YFP+ neurons, and the direction of the fold change, either up or down, is indicated by the “Regulation in GLT1+ cells”. The P-values shown are FDR corrected and was calculated by a non-paired Student’s t-test using a Benjamini-Hochberg FDR correction. Probe set ID refers to the Affymetrix 430 2.0 chip probesets. If several probeset existed for one gene, the most significant probeset is shown here.
